# Supplementary material
Source: bioRxiv or medRxiv preprint supplement (https://medrxiv.org/highwire/filestream/79673/field_highwire_adjunct_files/5/2020.04.28.20072710-6.pdf)

Kruskal-Wallis,  $p < 2.2e-16$

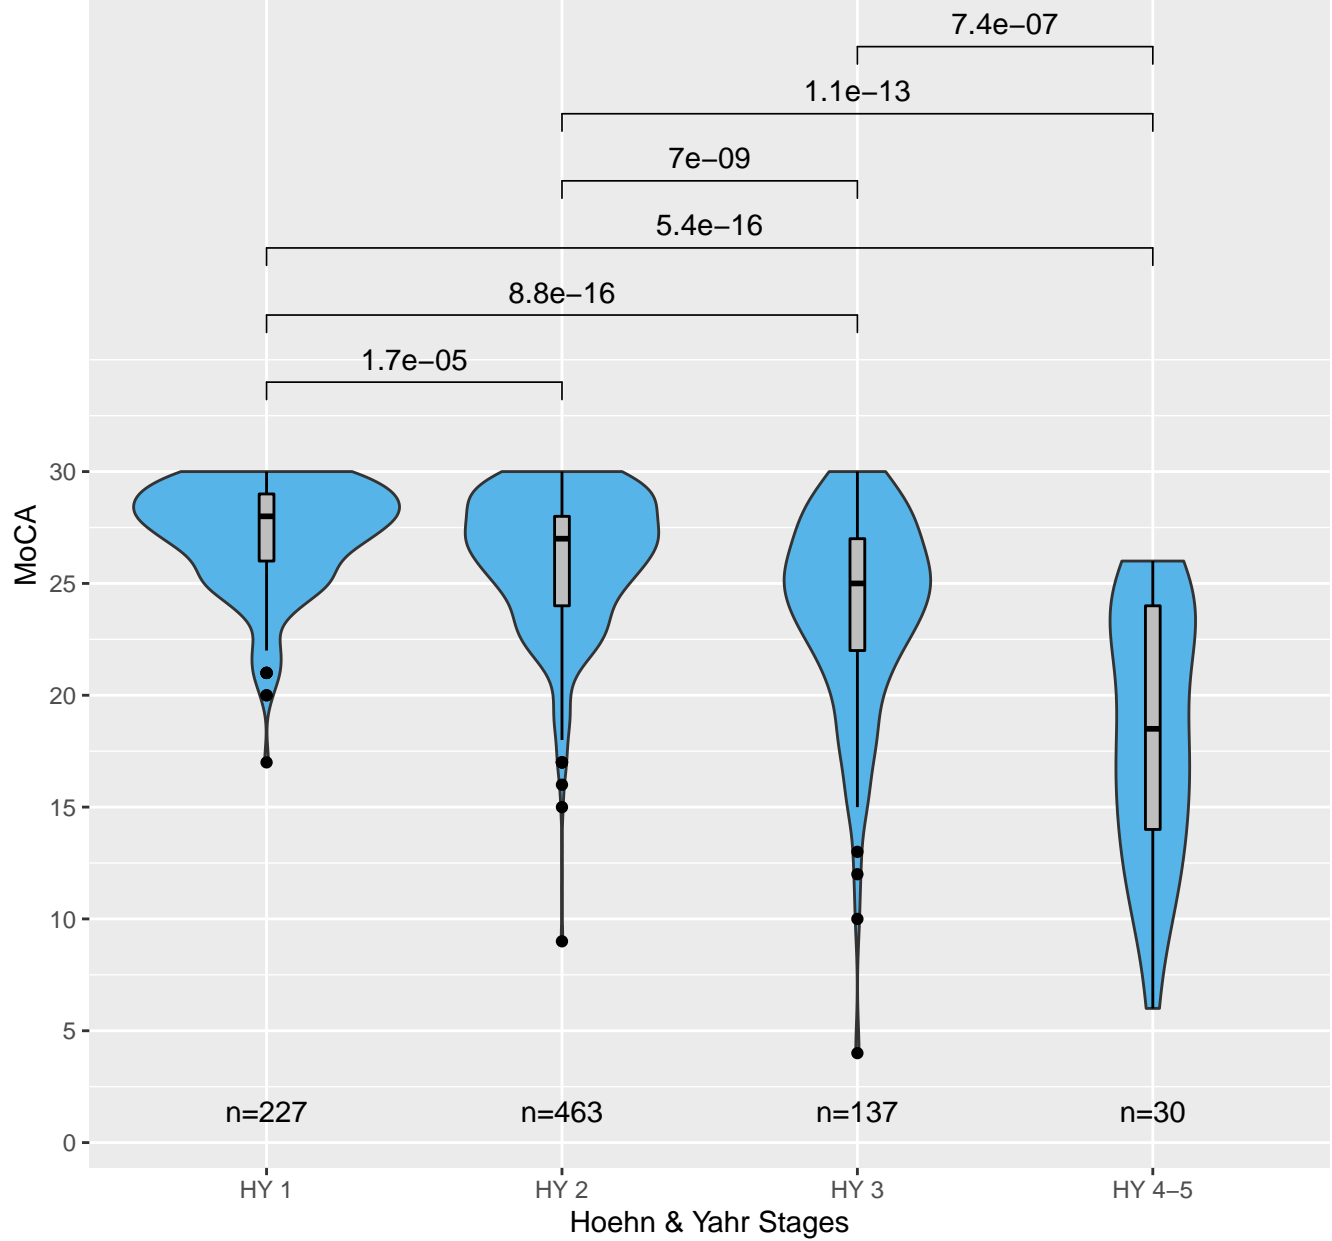

Supplement: Supplementary file [file 2020.04.28.20072710-6.pdf]
